# Supplementary material for: The metalloproteinase Papp-aa controls epithelial cell quiescence-proliferation transition
Source: eLife. 2020 Apr 16;9:e52322. doi: 10.7554/eLife.52322 (PMC7185994; doi:10.7554/eLife.52322)
Supplement: Figure 1—source data 1. [file elife-52322-fig1-data1.xlsx]

## Sheet: Figure 1
	Figure 1A
		N Ca				L Ca
	papp-aa	3.05492	1.60017	2.00566	1.54238	1.55736	2.68572	2.22708	3.14578
	papp-ab	1.12196	1.06026	1.39639	1.16788	1.25415	1.3504	1.16422	1.2726
	papp-a2	1.33973	1.07153	0.906626	0.695419	0.636548	0.81504	1.20816	1.34025
	Figure 1B
	Non-NaR	NaR
	1	4.75025
	1	14.5497
	0.999973	10.4832
	Figure 1C
	Non-NaR	NaR
	1	1.93169
	1	0.247404
	0.999976	0.998385
	0.999966	0.98657
