# Supplementary material for: The metalloproteinase Papp-aa controls epithelial cell quiescence-proliferation transition
Source: eLife. 2020 Apr 16;9:e52322. doi: 10.7554/eLife.52322 (PMC7185994; doi:10.7554/eLife.52322)
Supplement: Figure 2—figure supplement 1—source data 1. [file elife-52322-fig2-figsupp1-data1.xlsx]

## Sheet: Figure S1
	Figure S1B				Figure S1C
	WT	pappaa+/-	pappaa-/-		WT	pappaa+/-	pappaa-/-
	77	121	40		149	87	55
	83	99	28		121	139	74
	77	87	76		71	123	144
	31	56	86		183	54	77
	104	63	87		158	106	117
	124	66	74		125	139	30
	70	49	38		217	36	87
	45	56	38		159	68	167
	15	10	14		146	55	128
	95	68	83		160	130	161
	45	46	109		198	152	167
	106	33	109		72	154	171
	102	54	64			171	172
	104	48	111			153	166
	78	29	97			158	139
		100	90			141	150
		47	76			175	111
		90	65			138	82
		44	74			64	114
		87				213	185
		54				142	124
		91				85	84
		73				119	73
		95				166	78
		138				136	138
		100				172	157
		87					176
		62
		95
		99
		92
