# Supplementary material for: The metalloproteinase Papp-aa controls epithelial cell quiescence-proliferation transition
Source: eLife. 2020 Apr 16;9:e52322. doi: 10.7554/eLife.52322 (PMC7185994; doi:10.7554/eLife.52322)
Supplement: Figure 2—figure supplement 2—source data 1. [file elife-52322-fig2-figsupp2-data1.xlsx]

## Sheet: Data
normal Ca NaR cell count										low Ca NaR cell count
larva #	count 1	count 2	average	larva ID	label #	genotype				larva #	count 1	count 2	average	larva ID	label #	genotype
1	55	53	54	norm1	BZZ294	++				1	181	183	182	low1	BZZ350	+-
2	53	51	52	norm2	BZZ295	++				2	130	127	128.5	low2	BZZ351	+-
3	53	54	53.5	norm3	BZZ296	+-				3	158	163	160.5	low3	BZZ352	+-
4	60	63	61.5	norm4	BZZ297	++				4	225	235	230	low4	BZZ353	--
5	111	113	112	norm5	BZZ298	+-				5	197	201	199	low5	BZZ354	++
6	76	82	79	norm6	BZZ299	++				6	292	305	298.5	low6	BZZ355	+-
7	48	46	47	norm7	BZZ300	+-				7	118	122	120	low7	BZZ356	+-
8	39	39	39	norm8	BZZ301	+-				8	250	255	252.5	low8	BZZ357	+-
9	87	89	88	norm9	BZZ302	+-				9	313	318	315.5	low9	BZZ358	++
10	87	91	89	norm10	BZZ303	+-				10	77	77	77	low10	BZZ359	+-
11	113	109	111	norm11	BZZ304	+-				11	123	121	122	low11	BZZ360	+-
12	101	97	99	norm12	BZZ305	+-				12	138	135	136.5	low12	BZZ361	+-
13	56	58	57	norm13	BZZ306	++				13	277	280	278.5	low13	BZZ362	+-
14	98	98	98	norm14	BZZ307	++				14	212	204	208	low14	BZZ363	+-
15	83	85	84	norm15	BZZ308	--				15	171	170	170.5	low15	BZZ364	--
16	62	64	63	norm16	BZZ309	++				16	64	66	65	low16	BZZ365	++
17	100	102	101	norm17	BZZ310	--				17	196	197	196.5	low17	BZZ366	++
18	102	106	104	norm18	BZZ311	+-				18	287	284	285.5	low18	BZZ367	--
19	85	90	87.5	norm19	BZZ312	+-				19	168	169	168.5	low19	BZZ368	++
20	47	48	47.5	norm20	BZZ313	+-				20	239	241	240	low20	BZZ369	++
21	87	84	85.5	norm21	BZZ314	+-				21	205	206	205.5	low21	BZZ370	--
22	60	61	60.5	norm22	BZZ315	+-				22	180	190	185	low22	BZZ371	--
23	78	84	81	norm23	BZZ316	--				23	119	122	120.5	low23	BZZ372	+-
24	81	83	82	norm24	BZZ317	+-				24	240	238	239	low24	BZZ373	++
25	63	65	64	norm25	BZZ318	+-				25	150	151	150.5	low25	BZZ374	++
26	82	82	82	norm26	BZZ319	++				26	184	183	183.5	low26	BZZ375	BAD SEQUENCE
27	47	49	48	norm27	BZZ320	++				27	137	138	137.5	low27	BZZ376	--
28	97	99	98	norm28	BZZ321	+-				28	138	135	136.5	low28	BZZ377	+-
29	83	87	85	norm29	BZZ322	--				29	184	185	184.5	low29	BZZ378	++
30	45	47	46	norm30	BZZ323	+-				30	175	169	172	low30	BZZ379	+-
31	89	91	90	norm31	BZZ324	--				31	196	188	192	low31	BZZ380	+-
32	132	136	134	norm32	BZZ325	++				32	255	263	259	low32	BZZ381	++
33	150	148	149	norm33	BZZ326	+-				33	184	180	182	low33	BZZ382	++
34	56	60	58	norm34	BZZ327	++				34	134	307	220.5	low34	BZZ383	++
35	59	62	60.5	norm35	BZZ328	--				35	132	132	132	low35	BZZ384	+-
36	48	47	47.5	norm36	BZZ329	--				36	169	172	170.5	low36	BZZ385	++
37	72	73	72.5	norm37	BZZ330	+-				37	105	151	128	low37	BZZ386	++
38	53	50	51.5	norm38	BZZ331	+-				38	254	234	244	low38	BZZ387	--
39	41	41	41	norm39	BZZ332	++				39	209	208	208.5	low39	BZZ388	++
40	83	80	81.5	norm40	BZZ333	+-				40	165	160	162.5	low40	BZZ389	--
41	51	53	52	norm41	BZZ334	++				41	287	277	282	low41	BZZ390	+-
42	72	72	72	norm42	BZZ335	--				42	287	292	289.5	low42	BZZ391	++
43	123	120	121.5	norm43	BZZ336	++				43	336	340	338	low43	BZZ392	++
44	77	78	77.5	norm44	BZZ337	--				44	103	101	102	low44	BZZ393	--
45	62	62	62	norm45	BZZ338	++				45	206	203	204.5	low45	BZZ394	--
46	58	60	59	norm46	BZZ339	--				46	307	306	306.5	low46	BZZ395	++
47	56	56	56	norm47	BZZ340	--				47	249	245	247	low47	BZZ396	++
48	96	94	95	norm48	BZZ341	+-				48	222	220	221	low48	BZZ397	+-
49	108	112	110	norm49	BZZ342	++				49	63	65	64	low49	BZZ398	++
50	56	56	56	norm50	BZZ343	+-				50	278	271	274.5	low50	BZZ399	++
51	65	66	65.5	norm51	BZZ344	--				51	248	247	247.5	low51	BZZ400	+-
52	57	54	55.5	norm52	BZZ345	++				52	179	176	177.5	low52	BZZ401	++
53	99	105	102	norm53	BZZ346	+-
54	58	58	58	norm54	BZZ347	+-
55	86	85	85.5	norm55	BZZ348	--
56	85	82	83.5	norm56	BZZ349	+-

## Sheet: Data analysis
normal Ca NaR cell count										low Ca NaR cell count
larva #	count 1	count 2	average	larva ID	label #	genotype				larva #	count 1	count 2	average	larva ID	label #	genotype
	83	85	84	norm15	BZZ308	--	74.1923	average			225	235	230	low4	BZZ353	--	192.7	average
	100	102	101	norm17	BZZ310	--	15.5691	STD			171	170	170.5	low15	BZZ364	--	53.412	STD
	78	84	81	norm23	BZZ316	--	4.32	SEM			287	284	285.5	low18	BZZ367	--	16.89	SEM
	83	87	85	norm29	BZZ322	--					205	206	205.5	low21	BZZ370	--
	89	91	90	norm31	BZZ324	--					180	190	185	low22	BZZ371	--
	59	62	60.5	norm35	BZZ328	--					137	138	137.5	low27	BZZ376	--
	48	47	47.5	norm36	BZZ329	--					254	234	244	low38	BZZ387	--
	72	72	72	norm42	BZZ335	--					165	160	162.5	low40	BZZ389	--
	77	78	77.5	norm44	BZZ337	--					103	101	102	low44	BZZ393	--
	58	60	59	norm46	BZZ339	--					206	203	204.5	low45	BZZ394	--
	56	56	56	norm47	BZZ340	--
	65	66	65.5	norm51	BZZ344	--					181	183	182	low1	BZZ350	+-	182.5	average
	86	85	85.5	norm55	BZZ348	--					130	127	128.5	low2	BZZ351	+-	65.2999	STD
											158	163	160.5	low3	BZZ352	+-	14.98	SEM
	53	54	53.5	norm3	BZZ296	+-	79.3269	average			292	305	298.5	low6	BZZ355	+-
	111	113	112	norm5	BZZ298	+-	26.2324	STD			118	122	120	low7	BZZ356	+-
	48	46	47	norm7	BZZ300	+-	5.14	SEM			250	255	252.5	low8	BZZ357	+-
	39	39	39	norm8	BZZ301	+-					77	77	77	low10	BZZ359	+-
	87	89	88	norm9	BZZ302	+-					123	121	122	low11	BZZ360	+-
	87	91	89	norm10	BZZ303	+-					138	135	136.5	low12	BZZ361	+-
	113	109	111	norm11	BZZ304	+-					277	280	278.5	low13	BZZ362	+-
	101	97	99	norm12	BZZ305	+-					212	204	208	low14	BZZ363	+-
	102	106	104	norm18	BZZ311	+-					119	122	120.5	low23	BZZ372	+-
	85	90	87.5	norm19	BZZ312	+-					138	135	136.5	low28	BZZ377	+-
	47	48	47.5	norm20	BZZ313	+-					175	169	172	low30	BZZ379	+-
	87	84	85.5	norm21	BZZ314	+-					196	188	192	low31	BZZ380	+-
	60	61	60.5	norm22	BZZ315	+-					132	132	132	low35	BZZ384	+-
	81	83	82	norm24	BZZ317	+-					287	277	282	low41	BZZ390	+-
	63	65	64	norm25	BZZ318	+-					222	220	221	low48	BZZ397	+-
	97	99	98	norm28	BZZ321	+-					248	247	247.5	low51	BZZ400	+-
	45	47	46	norm30	BZZ323	+-
	150	148	149	norm33	BZZ326	+-					197	201	199	low5	BZZ354	++	210.182	average
	72	73	72.5	norm37	BZZ330	+-					313	318	315.5	low9	BZZ358	++	72.9028	STD
	53	50	51.5	norm38	BZZ331	+-					64	66	65	low16	BZZ365	++	15.54	SEM
	83	80	81.5	norm40	BZZ333	+-					196	197	196.5	low17	BZZ366	++
	96	94	95	norm48	BZZ341	+-					168	169	168.5	low19	BZZ368	++
	56	56	56	norm50	BZZ343	+-					239	241	240	low20	BZZ369	++
	99	105	102	norm53	BZZ346	+-					240	238	239	low24	BZZ373	++
	58	58	58	norm54	BZZ347	+-					150	151	150.5	low25	BZZ374	++
	85	82	83.5	norm56	BZZ349	+-					184	185	184.5	low29	BZZ378	++
											255	263	259	low32	BZZ381	++
	55	53	54	norm1	BZZ294	++	72.2647	average			184	180	182	low33	BZZ382	++
	53	51	52	norm2	BZZ295	++	27.622	STD			134	307	220.5	low34	BZZ383	++
	60	63	61.5	norm4	BZZ297	++	6.7	SEM			169	172	170.5	low36	BZZ385	++
	76	82	79	norm6	BZZ299	++					105	151	128	low37	BZZ386	++
	56	58	57	norm13	BZZ306	++					209	208	208.5	low39	BZZ388	++
	98	98	98	norm14	BZZ307	++					287	292	289.5	low42	BZZ391	++
	62	64	63	norm16	BZZ309	++					336	340	338	low43	BZZ392	++
	82	82	82	norm26	BZZ319	++					307	306	306.5	low46	BZZ395	++
	47	49	48	norm27	BZZ320	++					249	245	247	low47	BZZ396	++
	132	136	134	norm32	BZZ325	++					63	65	64	low49	BZZ398	++
	56	60	58	norm34	BZZ327	++					278	271	274.5	low50	BZZ399	++
	41	41	41	norm39	BZZ332	++					179	176	177.5	low52	BZZ401	++
	51	53	52	norm41	BZZ334	++
	123	120	121.5	norm43	BZZ336	++					184	183	183.5	low26	BZZ375	BAD SEQUENCE - excluded from data set
	62	62	62	norm45	BZZ338	++
	108	112	110	norm49	BZZ342	++
	57	54	55.5	norm52	BZZ345	++
