# Supplementary material for: The metalloproteinase Papp-aa controls epithelial cell quiescence-proliferation transition
Source: eLife. 2020 Apr 16;9:e52322. doi: 10.7554/eLife.52322 (PMC7185994; doi:10.7554/eLife.52322)
Supplement: Figure 2—figure supplement 3—source data 1. [file elife-52322-fig2-figsupp3-data1.xlsx]

## Sheet: Figure S3
	Figure S3B				Figure S3C				Figure S3D				Figure S3E
	WT	pappaa+/-	pappaa-/-		WT	pappaa+/-	pappaa-/-		WT	pappaa+/-	pappaa-/-		WT	pappaa+/-	pappaa-/-
	2.59603	2.69883	2.48512		24	27	23		58.976	46.897	54.135		169.687	156.78	162.692
	2.61136	2.46619	2.44545		25	25	24		51.896	57.568	63.572		162.259	163.808	158.945
	2.5284	2.43372	2.45897		26	25	26		54.75	69.944	64.699		162.898	164.657	160.103
	2.58431	2.51217	2.51488		24	26	24		64.255	62.774	45.246		168.246	167.61	163.575
	2.48061	2.56267	2.53562		23	23	24		54.687	55.614	57.538		156.031	159.003	165.687
	2.75834	2.39405	2.62128		26	25	25		57.678	61.965	52.718			159.156	163.592
		2.633	2.57529			26	25			52.886	55.321			165.687	165.513
		2.55906	2.66276			26	25			54.667	52.443			174.631	151.653
		2.55095	2.57169			23	26			62.96	61.818			165.424	164.506
		2.61497	2.72678			23	26			58.66	50.745			160.956	153.076
		2.5771	2.59333			23	25			57.588	58.774			163.555	169.561
		2.53291	2.59243			24	24			60.95	54.697			156.614	156.171
		2.65735	2.53472			25	25			57.028	66.072			165.422	160.885
		2.57078	2.67448			24	26			52.023	53.953			162.347
		2.45717				22				69.128				162.281	157.912
		2.56537				24				48.997				161.157
		2.52389				26				56.595				156.448
		2.54373				26				54.612				162.065
		2.50857				27				56.277				166.11
		2.54463				24				57.869				161.545
		2.64022				25				54.245				165.034
		2.50225				24				54.417				161.226
		2.55636				23				55.422				163.747
		2.48602				27				57.489				161.598
		2.5771								31.072				154.827
