# Supplementary material for: The metalloproteinase Papp-aa controls epithelial cell quiescence-proliferation transition
Source: eLife. 2020 Apr 16;9:e52322. doi: 10.7554/eLife.52322 (PMC7185994; doi:10.7554/eLife.52322)
Supplement: Figure 2—figure supplement 4—source data 1. [file elife-52322-fig2-figsupp4-data1.xlsx]

## Sheet: Figure S4
	Figure S4B				Figure S4C
	papp-aa+/+	papp-aa+/-	papp-aa-/-		papp-aa+/+	papp-aa+/-	papp-aa-/-
	10	10	0		6	7	0
	10	10	0		10	10	0
	10	10	0		8	7	0
	9	10	0		10	8	0
	10	9	0		10	10	0
	10	6	0		10	6	0
	10	7	0			5	0
		10	0			8	0
		8	0			10	0
		9	0			10	0
		9	0			10	0
		7	0			10	0
		9	0			10	0
		9	0			10
		10	0			10
		10	0			7
		10
		10
		7
		10
		10
		6
		10
		10
		10
		10
