# Supplementary material for: The metalloproteinase Papp-aa controls epithelial cell quiescence-proliferation transition
Source: eLife. 2020 Apr 16;9:e52322. doi: 10.7554/eLife.52322 (PMC7185994; doi:10.7554/eLife.52322)
Supplement: Figure 2—source data 1. [file elife-52322-fig2-data1.xlsx]

## Sheet: Figure 2
	Figure 2C							Figure 2E
	WT	pappaa+/-	pappaa-/-	WT	pappaa+/-	pappaa-/-		WT	pappaa+/-	pappaa-/-	WT	pappaa+/-	pappaa-/-	WT	pappaa+/-	pappaa-/-
	63	81	40	207	137	20		38	18	15	90	87	49	248	264	28
	66	57	38	280	272	45		41	33	12	70	89	40	252	288	33
	61	100	46	250	284	24		33	57	24	70	77	58	280	100	36
	61	67	29	296	308	27		61	31	15	75	109	28	152	276	23
	34	72	19	292	328	37		27	44	26	102	89	55	240	200	32
	45	75	31	228	221	29		40	40	35	108	77	56	304	284	52
	88	64	56	220	272	31		56	39	31	120	58	62	272	272	33
	32	98	41	152	228	54		48	48	43	91	103	58	252	284	30
	62	62	23	298	316	58		57	37	13	84	75	29	89	296	33
	46	62	53	264	191	38		26	18	13	73	59	36	192	244	58
	42	35		239	203	66		41	48	16	125	98	40	170	180	42
	52	75		259	217	63		50	46	32	108	78	55	154	276	28
	55	24		280	123	72		29	21	19	60	78	41	303	256	25
	67	71		194	183	71		49	43	16	99	84	51	138	195	23
	81	75		338	310	47		21	37	10	62	86	53	136	196	41
	55	74		287	218	64		21	39	14	74	104	54	169	346	21
	4	61		153	302	26		42	63	38		59	51	215	185	49
	79	62		240	333	55		33	45	39		97	51	247	131	45
	57	63			317			30	54	34		91	45	204	202	44
	119	69			291			26	29	27		61	67	352	181	47
		58			308			39	25	21		96	89	275	92	34
		77			224			37	33	21		61	61	188	159	77
		40			232			32	22	19		75	57	278	115	37
		32			259			31	47	22		89	56	130	187	56
		58			297			47	45	29		62	40	302	49	36
		72			260			29	37	34		40	63	234	159	70
		52			217			45	30	13		85	61	200	105	51
		29			258			32	44	21		109	45	199	256	45
					245			38	31	17		125		281	211	15
					244			67	54	24		68			203
								41	61	19		88			153
								30	61	20		89			186
								33	25	21		65			254
								40	40	18		99			333
								32	55	15		97			167
								39	37	21		88			287
								27	23	18		89			225
								35	24	14		74			282
									45	42		65			255
									32	16		75			181
									19	33		92			348
									34	26		105			201
									13	37		101			187
									55	26		94			214
									51	28		71			258
									49	19		61			203
									32
									29
									46
									48
									20
									25
									30
									18
									25
									43
									54
									33
									24
									24
									40
									39
									31
									55
									30
									32
									38
									21
									48
									49
									42
									31
									27
									39
									54
									39
									45
									20
									38
									42
									42
									42
