# Supplementary material for: The metalloproteinase Papp-aa controls epithelial cell quiescence-proliferation transition
Source: eLife. 2020 Apr 16;9:e52322. doi: 10.7554/eLife.52322 (PMC7185994; doi:10.7554/eLife.52322)
Supplement: Figure 3—source data 1. [file elife-52322-fig3-data1.xlsx]

## Sheet: Figure 3
	Figure 3B					Figure 3D						Figure 3E
	mCherry	100	0	0		Ctrl	1	2	4	8		DMSO	Batimastat
	Pappaa	27	73	0		356	196	66	104	50		141	68
	Pappaa E501A	100	0	0		316	168	83	73	82		223	196
						176	156	62	99	63		169	106
						244	152	120	121	58		141	87
						228	196	72	88	63		140	204
	Figure 3G					200	192	97	94	66		110	113
		-	+	++		240	164	92	52	64		144	94
	mcherry	0.346667	0.493333	0.16		264	144	124	87	74		142	126
	hSTC1	0.810127	0.189873	0		360	252	178	124	53		166	134
						220	192	200	135	82		171	134
						180	212	280	68	88		206	143
						216	112	231	123	74		124	101
	Figure 3H					260	244	181	134	37		218	124
		-	+	++		228	168	182	176	55		156	91
	mcherry	0.162228	0.372881	0.464891		168	148	90	135	71		170	120
	hSTC2	0.578125	0.390625	0.03125		152	256	240	105	115		84	116
						248	168	147	42	40		90	64
						348	204	309	109	64		78	67
						284	276	148		38		255	58
						220	296	184				113	114
						140		104				170	136
												223	207
												238	96
												205	151
													47
