# Supplementary material for: The metalloproteinase Papp-aa controls epithelial cell quiescence-proliferation transition
Source: eLife. 2020 Apr 16;9:e52322. doi: 10.7554/eLife.52322 (PMC7185994; doi:10.7554/eLife.52322)
Supplement: Figure 4—source data 1. [file elife-52322-fig4-data1.xlsx]

## Sheet: Figure 4
Figure 4D										Figure 4E
	Normal Ca				Low Ca					Siblings	pappaa-/-;	ifgbp5a-/-	pappaa-/-;igfbp5a-/-	Siblings	pappaa-/-;	ifgbp5a-/-	pappaa-/-;igfbp5a-/-
igfbp1b	7.03494	20.5567	4.80783	10.0464	16.1293	32.6132	7.52285	5.32159		65	69	57	90	314	41	89	75
igfbp2a	133.06	173.191	86.5193	109.157	149.935	165.784	86.4212	106.994		128	25	100	85	312	19	91	201
igfbp2b	1.65458	2.17818	1.76725	0.72414	1.52243	2.69711	0.996348	1.35991		82	55	68	102	214	29	113	24
igfbp3	12.8613	19.9142	13.8487	16.4506	14.0153	13.5477	10.0934	22.4141		81	96	74	67	210	22	56	24
igfbp5a	88.0188	42.2741	26.3071	65.2686	90.1752	40.2515	30.3138	90.8355		95	103	94	50	237	22	77	102
igfbp5b	8.21343	10.2553	8.28308	14.4196	8.9855	11.4048	6.6421	21.413		92	80	76	69	318	29	138	56
igfbp6a	1.67411	0	0	0	1.04599	0	0	0		85	68	50	58	190	17	42	66
igfbp6b	3.33701	3.80146	3.27007	13.291	4.94961	6.21729	3.81188	9.50775		95	63	68	62	236	3	76	74
										75	47	74	32	291	19	130	66
										52	73	81	73	243	36	6	23
										78	77	76	70	206	33	131	77
										72	39	78	76	232	32	45	142
										72	24	67	56	288	45	68	67
										86	53	71	79	387	21	92	67
										66	77	87	67	260	13	190	13
										100	76	67	55	244	21	17	41
										76	63	75	61	354	17	117	61
										96	55	62	55	362	28	133	42
										84		78	54	354	34	60	46
										31		77	22	201	19	58
										70		60		326	41	47
										80		73		268	52	161
										107		87		436	45	75
										83		49		217		42
										100		83		327		104
										86		63		277		118
										92		96		282		32
										67		92		210		91
										107		120		271		86
										73		71		395		177
										85		80		434		129
										127		83		443		114
										109		90		332		144
										69		55		158		181
										67		82		224		87
										107		80		110		94
										85		83		306		98
										139		68		299		77
										105		93		244		102
										93		82		255		62
										98		77		357		45
										91		105		366		89
										100		103		405		93
												60		350		91
														430		134
														262		104
																87
																92
																92
																53
																35
																160
																68
