# Supplementary material for: The metalloproteinase Papp-aa controls epithelial cell quiescence-proliferation transition
Source: eLife. 2020 Apr 16;9:e52322. doi: 10.7554/eLife.52322 (PMC7185994; doi:10.7554/eLife.52322)
Supplement: Figure 5—figure supplement 1—source data 1. [file elife-52322-fig5-figsupp1-data1.xlsx]

## Sheet: Figure S6
Fig. S6A	pS6 positive cell number											Figure S6B
												Siblings	papp-aa-/-	ifgbp5a-/-	papp-aa-/-;igfbp5a-/-	Siblings	papp-aa-/-	ifgbp5a-/-	papp-aa-/-; igfbp5a-/-
WT	pappaa+/-	pappaa-/-	WT	pappaa+/-	pappaa-/-							14	19	15	5	32	11	19	23
56	85	57	124	85	93							0	0	32	0	52	0	20	37
82	89	65	89	118	86							0	38	0	0	87	0	24	10
44	66	54	32	121	55							48	13	3	33	63	0	42	16
103	48	74	127	140	80							0	8	9	9	43	0	23	10
65	41	66	126	109	108							0	6	0	12	75	4	24	14
92	101	34	129	81	34							3	11	4	2	68	0	14
	83	97	76	128	79							13	21	0	7	68	8	42
	71		142	119	111							17	6	0	0	63	0	10
	73		117	126	120							12	0	19	5	66	7	59
	74		121	111	89							5	0	0	4	149	6	23
	100		136	156	108							0	1	0	0	89	0	40
	38		132	116	125							4	7	40	0	34	4	25
	53		142	142	107							34	7	0	32	45	13	68
	66			134	96							0	22	0	25	111	14	30
	68			132								0	2	0	43	50	23	11
				97								3		6		102	6	22
				134								12		0		66	0	51
				126								2		0		84	11	43
				143								12		5		99		31
				154								0		13		70		7
				143								4		0		105		70
				134								0		0		71		36
												0		12		103		25
												0		15		67		27
												0		5		63		35
												0		0		115		44
												0		12		40		3
												9		0		115		20
												0		9		103		41
												0		0		103		55
												0		27		152		24
												0		0		86		11
												2		0		92
												0		0		134
												6		2		61
												2				28
												5				79
												16				93
												0				72
												0				75
												2				78
												0				77
												4				76
												0				67
												0				80
												0				70
																63
																65
																125
