# Supplementary material for: The metalloproteinase Papp-aa controls epithelial cell quiescence-proliferation transition
Source: eLife. 2020 Apr 16;9:e52322. doi: 10.7554/eLife.52322 (PMC7185994; doi:10.7554/eLife.52322)
Supplement: Figure 5—source data 1. [file elife-52322-fig5-data1.xlsx]

## Sheet: Figure 5
	Figure 5B				Figure 5C						Figure 5D			Figure 5F
	WT	pappaa+/-	pappaa-/-		Ctrl	1	2	4	8		DMSO	Batimastat			-	+	++
	51	51	0		54	52	56	7	38		49	33		mCherry	0.9365	0.0635	0
	61	41	0		46	58	55	10	18		42	23		myr-Akt	0.1492	0.3646	0.4862
	73	60	0		66	61	32	13	28		121	34
	46	66	2		58	53	46	32	13		55	8
	66	43	0		58	66	47	63	18		37	5
	58	41	4		48	55	46	34	50		32	21
	59	55	0		47	74	33	22	11		59	12
	64	55	0		32	58	65	14	23		27	31
	55	59	0		20	59	43	32	32		22	21
	45	51	0		34	29	32	42	17		77	0
	64	47	0		87	76	27	43	22		68	17
	48	54	0		21	39	22	17	22		46	28
	63	37	0		74	44	39	44	2		24	34
	57	67	0		70	56	42	26	7		35	31
	55	49	0		37	64	17	4	35		64	0
	36	88	2		79	26	58	26	14		47	10
	64	73	7		60	41	18	19	13		80	14
	55	61	0		66	49	21	19	31		37	25
	46	39	0		56	57	38	37	15			9
	36	61	0		68	36	32	1	15			9
	53	60	0		75	74	17	9	59			23
	77	44	0		83	71	36		9			13
	60	43	0		68	65	12		10			15
	59	49	51		89	46						14
	78	47	0
		41
		41
		65
		35
		55
		54
		68
		32
		47
		44
		70
		63
		29
		54
		35
		46
		23
		31
		57
		44
		39
		71
		64
		42
		62
		68
		70
		58
		100
		83
		70
		52
		53
