# Supplementary material for: The metalloproteinase Papp-aa controls epithelial cell quiescence-proliferation transition
Source: eLife. 2020 Apr 16;9:e52322. doi: 10.7554/eLife.52322 (PMC7185994; doi:10.7554/eLife.52322)
Supplement: Figure 6—figure supplement 1—source data 1. [file elife-52322-fig6-figsupp1-data1.xlsx]

## Sheet: Figure S7
	Figure S7A						Figure S7B
		-	+	++	+++		DMSO	NBI 90µM	Wortmanin 0.06µM	U0126 2µM	NBI + Wortmanin 0.06µM	NBI 90µM +U0126 2µM
	DMSO	0	50	30	20		128	151	60	35	58	150
	NBI	0	37.5	50	12.5		92	167	87	86	73	237
	NBI + BMS	10	70	20	0		82	91	89	32	111	51
							65	125	114	36	92	114
							100	107	21	36	89	112
							93	123	106	41	102	87
							55	137	82	25	132	101
							55	133	53	39	85	91
							96	124	55	38	88	186
							45	137	70	49	92	114
							32	151		32		144
							111	117		32		110
							81	107		74		117
							54	114
							56	110
							46	130
							45	142
							77	156
							95	144
							59	116
							74	100
							66	192
							66	86
