# Supplementary material for: The metalloproteinase Papp-aa controls epithelial cell quiescence-proliferation transition
Source: eLife. 2020 Apr 16;9:e52322. doi: 10.7554/eLife.52322 (PMC7185994; doi:10.7554/eLife.52322)
Supplement: Figure 6—figure supplement 2—source data 1. [file elife-52322-fig6-figsupp2-data1.xlsx]

## Sheet: Sheet1
Figure S8
Ctrl	Fish IGF-1
72	99
85	119
63	54
77	138
81	71
121	95
107	141
52	77
74	104
60	80
39	61
25	55
92	59
45	151
53	98
50	101
43	112
	129
	158
	128
	138
	91
	57
	58
