# Supplementary material for: The metalloproteinase Papp-aa controls epithelial cell quiescence-proliferation transition
Source: eLife. 2020 Apr 16;9:e52322. doi: 10.7554/eLife.52322 (PMC7185994; doi:10.7554/eLife.52322)
Supplement: Figure 6—source data 1. [file elife-52322-fig6-data1.xlsx]

## Sheet: Figure 6
	Figure 6 B					Figure 6 C				Figure 6 D				Figure 6 E						Figure 6 F
	DMSO	60	90	120		DMSO	NBI	NBI + BMS		DMSO	NBI	NBI + BMS		DMSO	NBI	NBI + BMS	NBI + MK	NBI + Rapa		Ctrl	Human IGF-1
	85	90	113	184		0	1	10		80	144	128		85	142	74	105	82		166	79
	99	113	105	108		0	13	0		120	187	123		69	135	33	84	82		11	102
	71	103	180	161		0	14	0		131	159	93		91	115	69	122	82		100	190
	108	91	136	118		0	6	0		79	141	87		92	125	82	85	61		62	139
	68	84	98	189		0	16	0		153	111	100		71	140	62	82	65		92	144
	79	90	120	127		0	20	2		93	147	96		89	99	100	89	46		155	86
	76	100	99	135		0	23	0		88	170	83		97	95	76	99	71		139	156
	61	86	98	175		0	21	0		120	145	90		87	115	50	80	72		178	218
	88	94	132	93		0	13	0		93	126	94		64	141	71	92	66		110	129
	81	107	88	130		2	7	0		129	102	103		63	120	71	87	78		131	155
	75	54	133	132		0	12	0		125	140	94				56		66		119	101
	72	80	137	129		0	1	0		118	139	118				89		106		55	117
	96	128	106	161		1	11	0		90	138	82				71		41		142	142
	93	102	103	122		0	16	3		128	93	88				84				133	159
	83	91	124	148		0	7	0			92					61				231	117
	74	126	114	140		0	23	0								62				96	150
	99	86	142	157		0	20	0								69				130	259
	63	87	144	140		0	5	0								74				83	132
	81	114	107	152		0	22	0								82				83	228
	84	108	109	175		0		0								92				150	89
	87	122	176	92		0		0								94				113	225
	99	105	101	148		0										23				166	179
	94	121	124	143		0										68				112	205
	105	82	107	184												85				112	135
	78	90	110	213																154	162
	76																			128	204
	94																			128	138
																				121	142
																				129	114
																				149	151
																				102	158
																				168	131
																				92	186
																				91	127
																				78	129
																					159
