# Supplementary material for: The metalloproteinase Papp-aa controls epithelial cell quiescence-proliferation transition
Source: eLife. 2020 Apr 16;9:e52322. doi: 10.7554/eLife.52322 (PMC7185994; doi:10.7554/eLife.52322)
Supplement: Supplementary file 1. [file elife-52322-supp1.xlsx]

## Sheet: Sheet1
Supplemental Table 1. Primers used in this study
Primer name	Sequence (5'-3')
papp-aa_qPCR_F	AAAGAGGAGGGCGTTCAAG
papp-aa_qPCR_R	TGCAGCGGATCACATTAGAG
papp-ab_qPCR_F	CCCAGCTTGTGTTACTTCTACG
papp-ab_qPCR_R	CCTTCGACTGACAGCTCTTT
papp-a2_qPCR_F	ACACACCGTACAACAACTACA
papp-a2_qPCR_R	TCATATCACCCTCCCTGTGG
β-actin_qPCR_F	GATCTGGCATCACACCTTCTAC
β-actin_qPCR_R	CCTGGATGGCCACATACAT
18s_qPCR_F	AATCGCATTTGCCATCACCG
18s_qPCR_R	TCACCACCCTCTCAACCTCA
pappaa-probe-F	TCCGCTCACTTCAACTCCTC
pappaa-probe-R	GCGTTTGGATCGGGTGTTTC
pappaa-HRMA-F	GGCTCTTTAGACACCACTCTG
pappaa-HRMA-R	CCACTTCAGTGTTATCGCACAC
pappaa-SacII-F	CCGCCGCGGGCCACCATGAAAGTTTGGAC
pappaa-BamH1-stop-R	CGCGGATCCTTAGCCAAGAGAGTG
igfbp5a-myrAkt-F	TCGGTTTTGCCATTTCAAAGCTGGTGAAATAGGTGTTCTACAGTAGGACGGCCACCATGGGCAGCAACAAGAGCAAGCC
igfbp5a-pappaa-F	TCGGTTTTGCCATTTCAAAGCTGGTGAAATAGGTGTTCTACAGTAGGACGGCCACCATGAAAGTTTGGACTTTTCTCCAG
igfbp5a-STC1-F	TCGGTTTTGCCATTTCAAAGCTGGTGAAATAGGTGTTCTACAGTAGGACGGCCACCATGCTCCAAAACTCAGCAGTGCTTC
igfbp5a-STC2-F	TCGGTTTTGCCATTTCAAAGCTGGTGAAATAGGTGTTCTACAGTAGGACGGCCACCATGTGTGCCGAGCGGCTGGGCCAG
igfbp5a-pEGFP-C3–kan-R	GTTTACTTTTGTCCCATATAAAACAAATACTACAAGTCAATAAAACATACAGAACTCCAGCATGAGATCCCCGC
Igfbp5a-K147A-F	GCATGGCCTGAGCCTTCGCGCTGTTAATATGATCTCGCTGG
Igfbp5a-K147A-R	CCAGCGAGATCATATTAACAGCGCGAAGGCTCAGGCCATGC
Igfbp5a-K148A-F	CGAGATCATATTAACAGCAAGGCGGCTCAGGCCATGCGAAA
Igfbp5a-K148A-R	TTTCGCATGGCCTGAGCCGCCTTGCTGTTAATATGATCTCG
Igfbp5a-K147A_K148A-F	CTTTCGCATGGCCTGAGCCGCCGCGCTGTTAATATGATCTCGCTGG
Igfbp5a-K147A_K148A-R	CCAGCGAGATCATATTAACAGCGCGGCGGCTCAGGCCATGCGAAAG
Igfbp5b-K144A-F	AACAAGGCAGCCTGCTTCGCGCTGTTGATTACGTCTGG
Igfbp5b-K144A-R	CCAGACGTAATCAACAGCGCGAAGCAGGCTGCCTTGTT
Igfbp5b-K145A-F	CTTAAACAAGGCAGCCTGCGCCTTGCTGTTGATTACGTCT
Igfbp5b-K145A-R	AGACGTAATCAACAGCAAGGCGCAGGCTGCCTTGTTTAAG
Igfbp5b-K144A_K145A-F	GTCCTTAAACAAGGCAGCCTGCGCCGCGCTGTTGATTACGTCTGGTTTG
Igfbp5b-K144A_K145-R	CAAACCAGACGTAATCAACAGCGCGGCGCAGGCTGCCTTGTTTAAGGAC
